# Supplementary material for: Multi-Signal Sedimentation Velocity Analysis with Mass Conservation for Determining the Stoichiometry of Protein Complexes
Source: PLOS journal article supplement (doi:10.1371/journal.pone.0062694), 2013-05-16
Supplement: S1 (10.1371/journal.pone.0062694.s001) [file journal.pone.0062694.s001]

# The Mass Conservation Additions to the Multisignal Sedimentation Velocity Global Parameter Window in SEDPHAT

Chad A. Brautigam

Shae B. Padrick

Peter Schuck

# Standard Mass Conservation

Here, two “spectra” are being used to describe the information between 0.2 and 4 S.

The interface is divided into three segments for data entry:

- Segment 1 (highlighted with a red box):**
  - continuous ☒ segment 1
  - resolution: 75
  - lineal log ☒
  - s min: 0.200, s max: 4.000, frictional ratio: 1.498
  - ☒ spectrum 1: xt1/chr: 1.000, xt2/chr: 0.000, PP
  - ☒ spectrum 2: xt1/chr: 0.000, xt2/chr: 1.000, PP
  - ☒ fit f0
- Segment 2:**
  - ☒ segment 2
  - resolution: 75
  - lineal log ☒
  - s min: 4.100, s max: 15.000, frictional ratio: 1.543
  - ☒ spectrum 1: xt1/chr: 1.000, xt2/chr: 0.000, PP
  - ☒ spectrum 2: xt1/chr: 0.000, xt2/chr: 1.000, PP
  - ☒ fit f0
- Segment 3:**
  - ☐ segment 3
  - resolution: 0
  - lineal log ☒
  - s min: 17.000, s max: 60.000, frictional ratio: 1.200
  - ☐ spectrum 1: xt1/chr: 0.000, xt2/chr: 0.000, PP
  - ☐ spectrum 2: xt1/chr: 0.000, xt2/chr: 0.000, PP
  - ☐ fit f0

On the right side, the following options are available:

- ☒ discrete spectra in multiples of chromophore xt (except #1)
- ☒ contin. spectra in multiples of chromophore xt
- chromophore #1: xt wl 1: 65267.80, xt wl 2: 31645.00
- chromophore #2: xt wl 1: 232761.0, xt wl 2: 188280.0
- ☒ with total concentration prior knowledge
- integrate from s = 0.10 to 100.00
- ☐ penalize % defect
- ☐ auto adjust by chisq. P
- ☒ auto adjust enforce to within (%) 5.0000
- total chromophore #1 [uM]: 6.900
- total chromophore #2 [uM]: 2.300
- ☒ with Tikhonov regularization, P = 0.700
- ☒ normalize distributions
- Buttons: Cancel, OK

The checkbox turns Mass Conservation on.

The enforce to within % option has been selected, and 5.0 has been input to the entry box. The known concentrations of chromophore #1 (Tp34) and chromophore #2 (bLF) have been input.

# The Resulting Distribution

The preceding parameters could work for a better-behaved case, but there are pathologies present for these data:

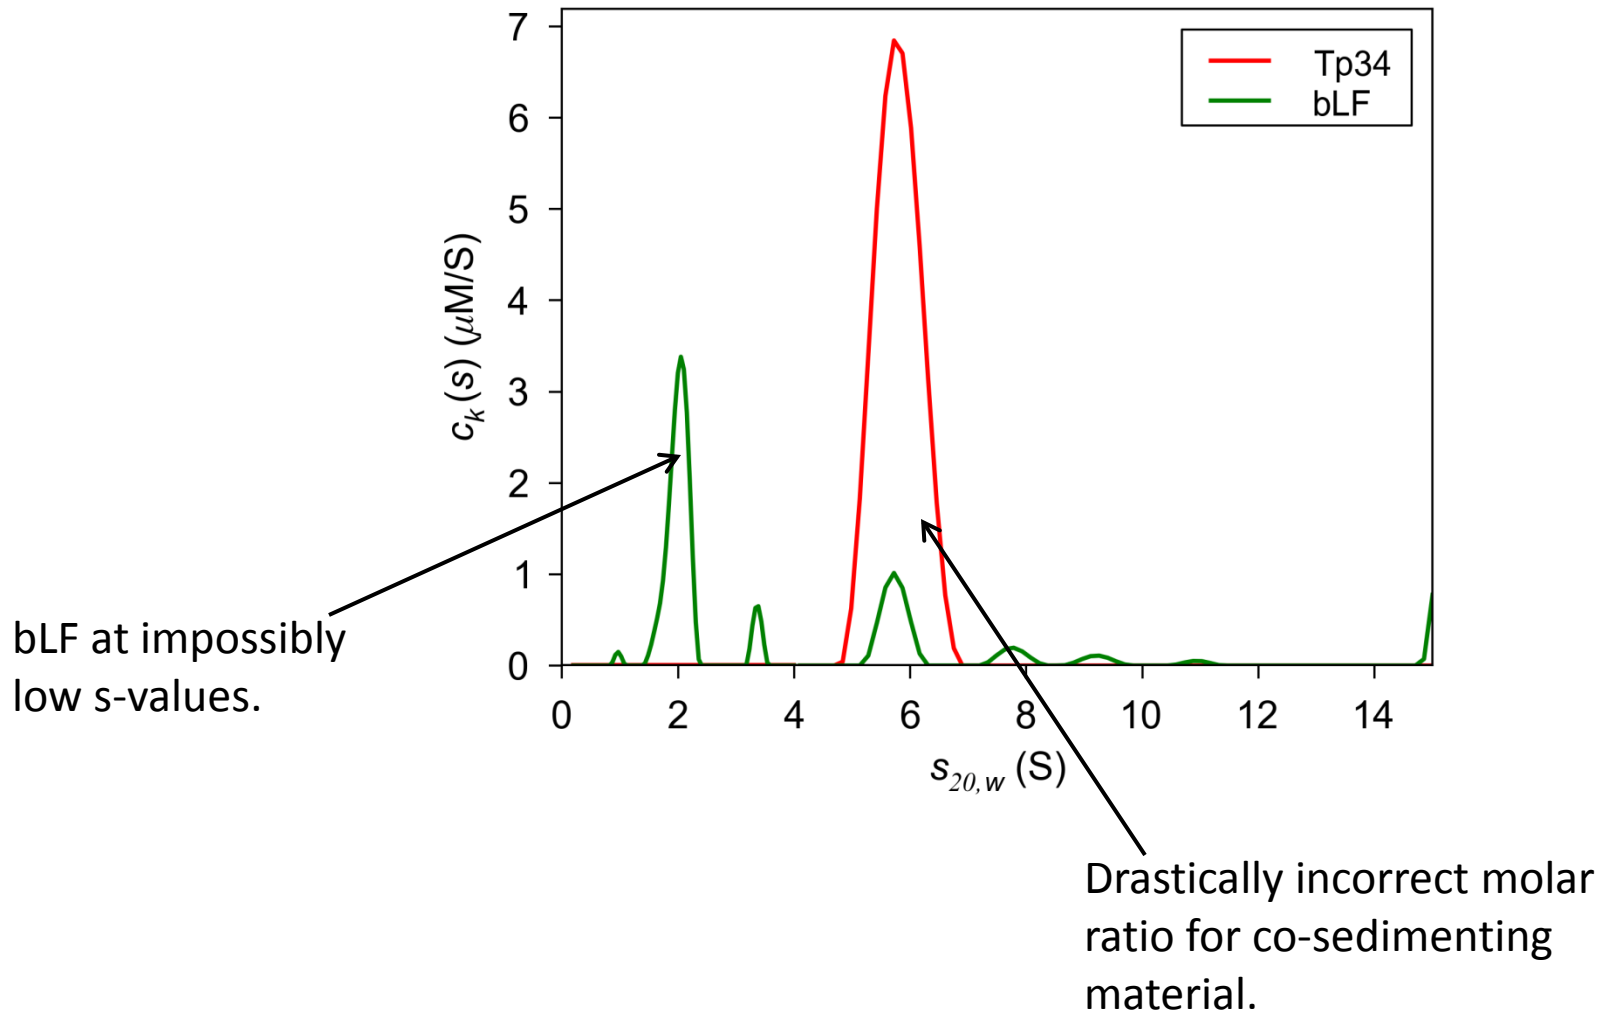

# Low-s-Constrained Mass Conservation

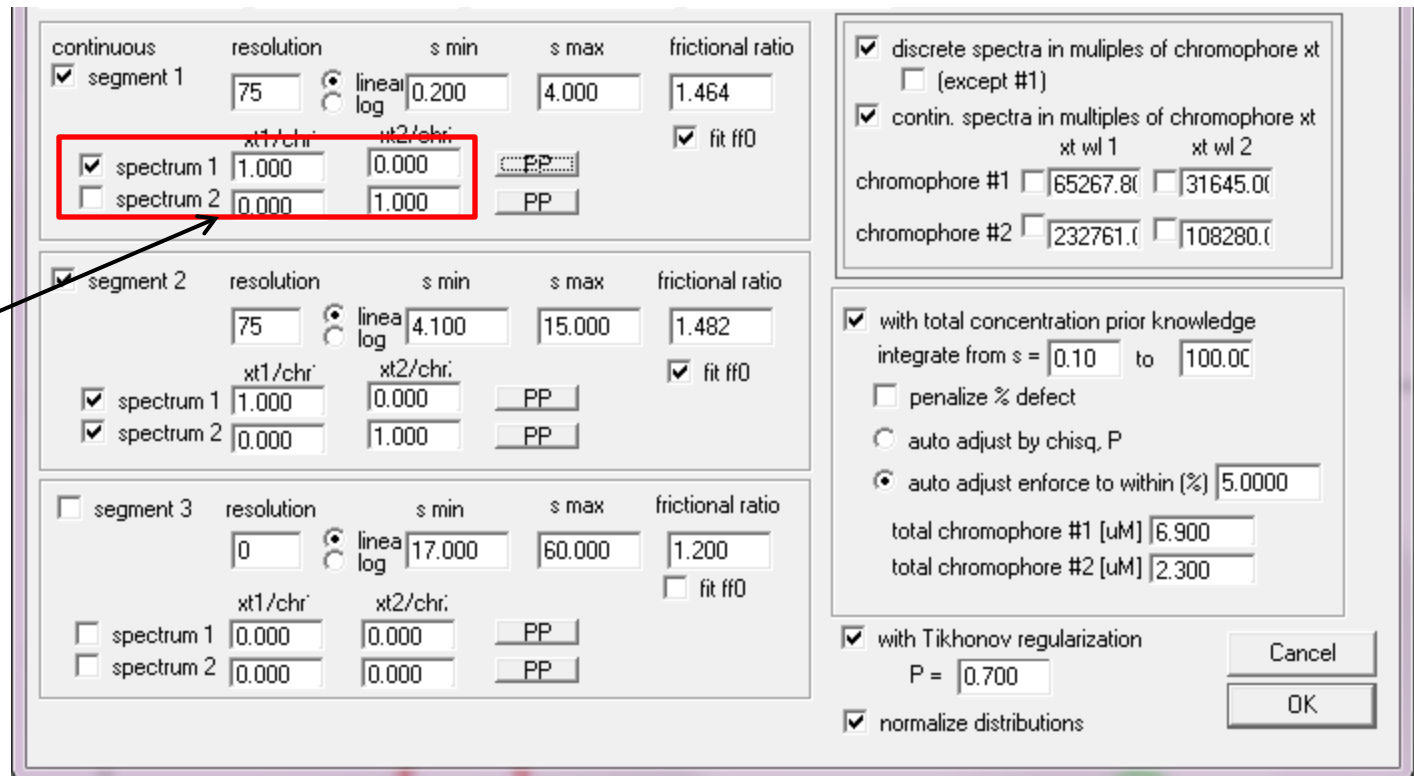

The screenshot shows a software interface with three segments for configuring mass conservation constraints. Segment 1 is active, and its parameters are as follows:

| continuous                                     | resolution     | s min          | s max          | frictional ratio                            |
|------------------------------------------------|----------------|----------------|----------------|---------------------------------------------|
| <input checked="" type="checkbox"/> segment 1  | 75             | linear<br>log  | 0.200<br>4.000 | 1.464                                       |
| <input checked="" type="checkbox"/> spectrum 1 | xt1/chr: 1.000 | xt2/chr: 0.000 | PP             | <input checked="" type="checkbox"/> fit ffo |
| <input type="checkbox"/> spectrum 2            | 0.000          | 1.000          | PP             |                                             |

Segment 2 parameters:

| resolution                                     | s min          | s max           | frictional ratio |
|------------------------------------------------|----------------|-----------------|------------------|
| 75                                             | linear<br>log  | 4.100<br>15.000 | 1.482            |
| <input checked="" type="checkbox"/> spectrum 1 | xt1/chr: 1.000 | xt2/chr: 0.000  | PP               |
| <input checked="" type="checkbox"/> spectrum 2 | 0.000          | 1.000           | PP               |

Segment 3 parameters:

| resolution                          | s min          | s max            | frictional ratio |
|-------------------------------------|----------------|------------------|------------------|
| 0                                   | linear<br>log  | 17.000<br>60.000 | 1.200            |
| <input type="checkbox"/> spectrum 1 | xt1/chr: 0.000 | xt2/chr: 0.000   | PP               |
| <input type="checkbox"/> spectrum 2 | 0.000          | 0.000            | PP               |

Global settings on the right:

- ☒ discrete spectra in multiples of chromophore xt  
☐ (except #1)
- ☒ contin. spectra in multiples of chromophore xt
- chromophore #1: xt wl 1 65267.80, xt wl 2 31645.00
- chromophore #2: 232761.0, 108280.0
- ☒ with total concentration prior knowledge  
integrate from s = 0.10 to 100.00
- ☐ penalize % defect
- ☐ auto adjust by chisq, P
- ☒ auto adjust enforce to within (%) 5.0000
- total chromophore #1 [uM] 6.900
- total chromophore #2 [uM] 2.300
- ☒ with Tikhonov regularization  
P = 0.700
- ☒ normalize distributions

Buttons: Cancel, OK

Here, spectrum 2 , which accounts for bLF, has been turned off, forcing all of the low-s material to be Tp34.

# The Final Distribution

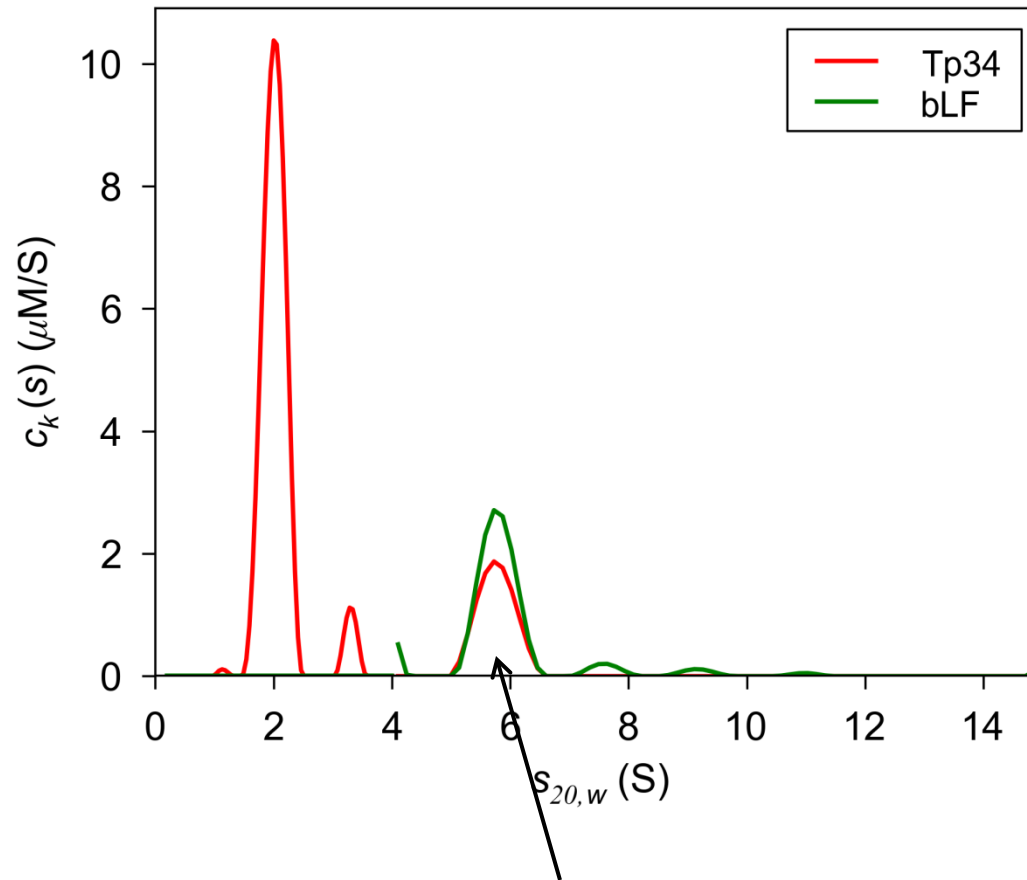

Now, a reasonable ratio of Tp34:bLF is found.
